# Supplementary material
Source: publisher site journal article supplement (https://www.dovepress.com/article/389094)
Supplement: Supplementary file 1 [file get_supplementary_file.php]

**Supplementary Table 1.** Comparison of estimated annualized bleeding rates for any, spontaneous, and traumatic bleeds, in patients receiving prophylaxis with rFIXFc versus N9-GP, after matching baseline variables of patients in the B-LONG study<sup>1</sup> with those in and PARADIGM 2.<sup>2</sup>

Rates with 95% confidence intervals are shown in the table.

| Scenario                   | MAIC model <sup>†</sup> | Any bleeding |                     |                     | Spontaneous bleeding |                     |                     | Traumatic bleeding |                     |                     |
|----------------------------|-------------------------|--------------|---------------------|---------------------|----------------------|---------------------|---------------------|--------------------|---------------------|---------------------|
|                            |                         | ABR N9-GP*   | ABR rFIXFc          | IRR rFIXFc vs N9-GP | ABR N9-GP*           | ABR rFIXFc          | IRR rFIXFc vs N9-GP | ABR N9-GP*         | ABR rFIXFc          | IRR rFIXFc vs N9-GP |
| Weekly prophylaxis         | Naïve                   |              | 3.11<br>(2.42–4.01) | 1.24<br>(0.67–2.31) |                      | 1.64<br>(1.18–2.28) | 1.34<br>(0.50–3.61) |                    | 1.27<br>(0.85–1.90) | 0.98<br>(0.50–1.91) |
|                            | Adjusted                |              | 2.55<br>(1.99–3.27) | 1.02<br>(0.55–1.89) |                      | 1.29<br>(0.93–1.80) | 1.06<br>(0.39–2.85) |                    | 1.15<br>(0.78–1.68) | 0.89<br>(0.46–1.71) |
| Individualized prophylaxis | Naïve                   | 2.51         | 2.35<br>(1.58–3.51) | 0.94<br>(0.47–1.88) | 1.22                 | 1.40<br>(0.86–2.28) | 1.15<br>(0.40–3.29) | 1.29               | 0.74<br>(0.36–1.52) | 0.57<br>(0.23–1.40) |
|                            | Adjusted                | (1.42–4.43)  | 2.70<br>(1.84–3.97) | 1.08<br>(0.54–2.14) | (0.48–3.10)          | 1.47<br>(0.90–2.41) | 1.21<br>(0.42–3.47) | (0.76–2.19)        | 1.08<br>(0.58–2.04) | 0.84<br>(0.37–1.91) |
| Pooled arms                | Naïve                   |              | 2.85<br>(2.30–3.52) | 1.13<br>(0.62–2.08) |                      | 1.56<br>(1.19–2.04) | 1.28<br>(0.48–3.37) |                    | 1.08<br>(0.78–1.51) | 0.84<br>(0.45–1.57) |
|                            | Adjusted                |              | 2.59<br>(2.10–3.19) | 1.03<br>(0.56–1.89) |                      | 1.34<br>(1.02–1.76) | 1.10<br>(0.42–2.91) |                    | 1.13<br>(0.82–1.56) | 0.88<br>(0.47–1.63) |

\*Efficacy data for patients assigned to N9-GP 40 IU/kg once weekly treatment group; <sup>†</sup>Naïve values show unadjusted data; modeling used data adjusted for age, weight, prior prophylaxis, White race, Asian ethnicity and the presence of target joints at baseline.

ABR, annualized bleeding rate; IRR, incidence rate ratio; MAIC, matching adjusted indirect comparison; N9-GP, nonacog beta pegol; rFIXFc, recombinant factor IX Fc fusion protein.

## References

1. Powell JS, Pasi KJ, Ragni MV, et al. Phase 3 study of recombinant factor IX Fc fusion protein in hemophilia B. *N Engl J Med*. 2013;369(24):2313–23.
2. Collins PW, Young G, Knobe K, et al. Recombinant long-acting glycoPEGylated factor IX in hemophilia B: a multinational randomized phase 3 trial. *Blood*. 2014;124(26):3880–6.
